# Supplementary material
Source: PubMed Central journal article supplement (PMC2492599)
Supplement: pp.108.115956_1.pdf [file pp.108.115956_1.pdf]

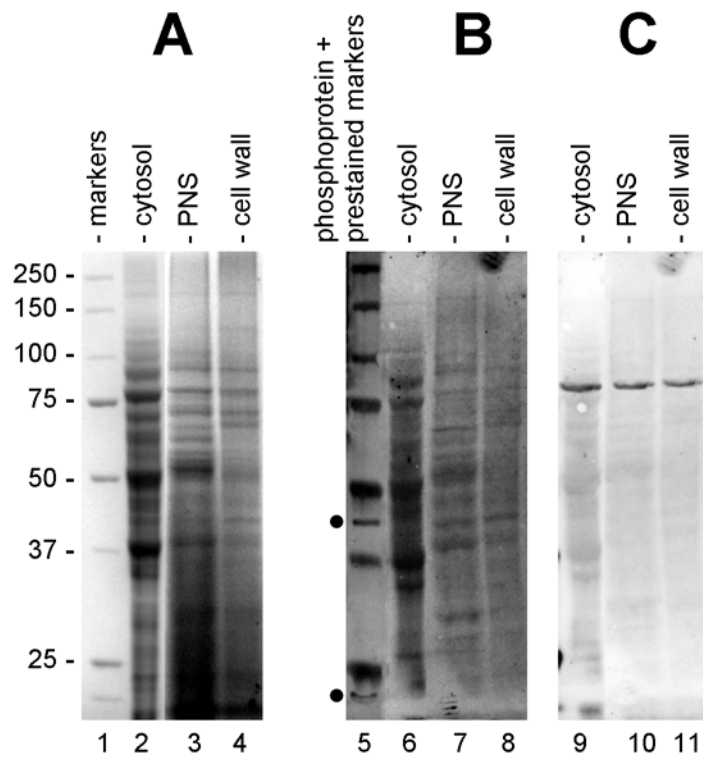

Supplemental figure 1. (A-C) 1-D DyeChrome double immunoblot analysis of different pollen tube extracts. (A) SDS-PAGE of molecular mass standards (lane 1), of pollen tube cytosolic proteins (lane 2), of PNS proteins (lane 3) and of SDS-extracted cell wall proteins (lane 4). (B) Immunoblot with phosphoserine antibody on Peppermint phosphoprotein molecular weight standards (lane 5, dots) mixed and then overlaid to prestained Precision standards, on cytosolic proteins (lane 6), on PNS proteins (lane 7) and on cell wall proteins (lane 8). (C) Immunoblot with Sus antibody on the same fractions.
