# Supplementary material
Source: PubMed Central journal article supplement (PMC2492599)
Supplement: pp.108.115956_2.pdf [file pp.108.115956_2.pdf]

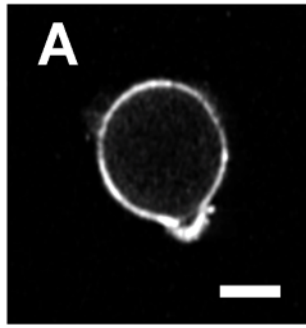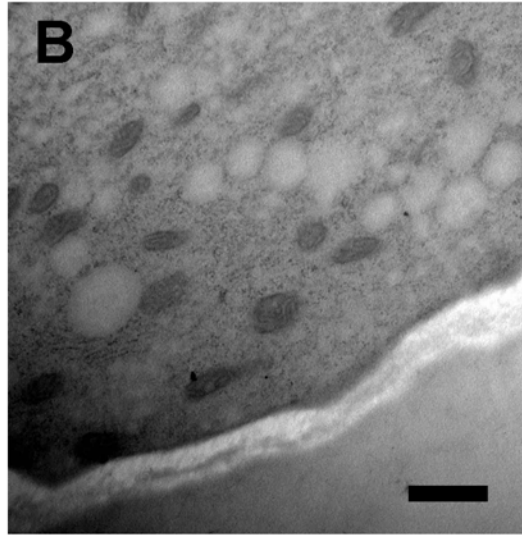

Supplemental figure 2. (A) Distribution of Sus at the onset of germination in tobacco pollen tubes visualized with antibody K2. Bar: 20  $\mu$ m. (B) Distribution of Sus in tobacco pollen tubes visualized by immunoelectron microscopy: control in the absence of the primary antibody. Bar: 400 nm.
